# Supplementary material for: Synthesis of aluminum complexes supported by 2-(1,10-phenanthrolin-2-yl)phenolate ligands and their catalysis in the ring-opening polymerization of cyclic esters
Source: Royal Society of Chemistry journal article supplement (doi:10.1039/c7ra03831c), 2017-01-01
Supplement: c7ra03831c1.pdf [file c7ra03831c1.pdf]

## Electronic supplementary information

# Synthesis of aluminum complexes supported by 2-(1,10-phenanthroline-2-yl)phenolate ligands and their catalysis in the ring-opening polymerization of cyclic esters

Xiang-Xin Zheng<sup>a</sup> and Zhong-Xia Wang<sup>\*,a,b</sup>

<sup>a</sup> CAS Key Laboratory of Soft Matter Chemistry, Hefei National Laboratory for Physical Sciences at Microscale and Department of Chemistry, University of Science and Technology of China, Hefei, Anhui 230026, People's Republic of China. Tel: 86 551 63603043; E-mail: zxwang@ustc.edu.cn

<sup>b</sup> Collaborative Innovation Center of Chemical Science and Engineering (Tianjin), Tianjin 300072, P. R. China.

### Contents

1. MALDI-TOF mass spectrum (matrix: DCTB) of PLA. Figure S1
2. Methine region of homonuclear decoupled <sup>1</sup>H NMR spectra of PLA. Figure S2
3. MALDI-TOF mass spectrum (matrix: DCTB) of PHB. Figure S3
4. <sup>13</sup>C NMR spectrum of PHB. Figure S4
5. <sup>1</sup>H NMR spectra of A-b-B copolymer. Figures S5-S6
6. The GPC curves of PCL and PCL-b-PLA copolymer catalyzed by **2f**. Figure S7
7. 2D DOSY NMR (CDCl<sub>3</sub>, 25 °C) of PCL-b-PLA. Figure S8
8. <sup>1</sup>H NMR and <sup>13</sup>C NMR spectra of compounds **1a-1d** and **2a-2f**. Figures S9-S28

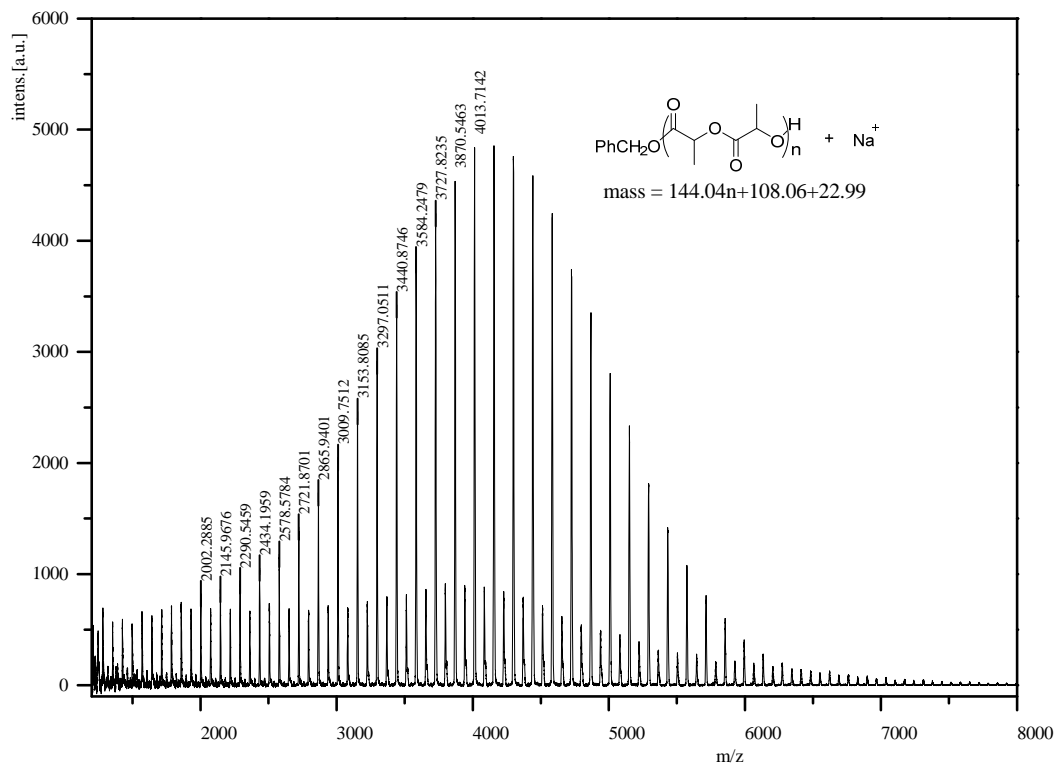

(a)

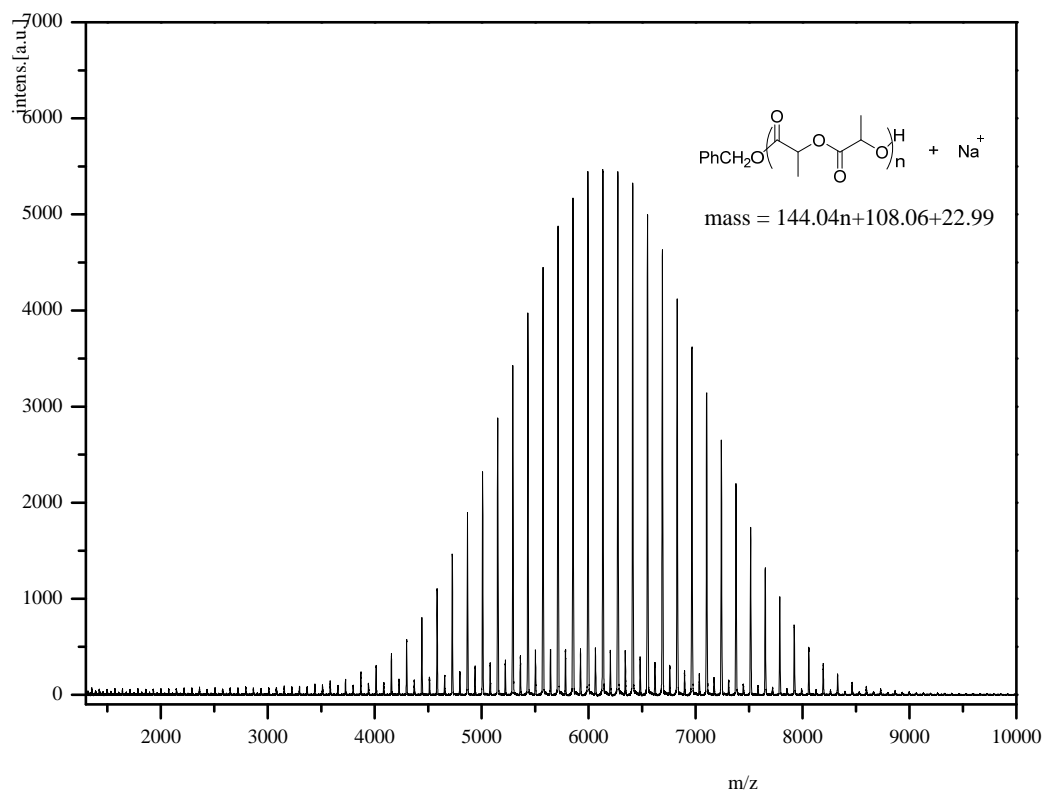

(b)

Figure S1. MALDI-TOF mass spectrum (matrix: DCTB) of PLA catalyzed by **2b**/BnOH (a, Table 2, entry 7) and **2f** (b, Table 2, entry 12).

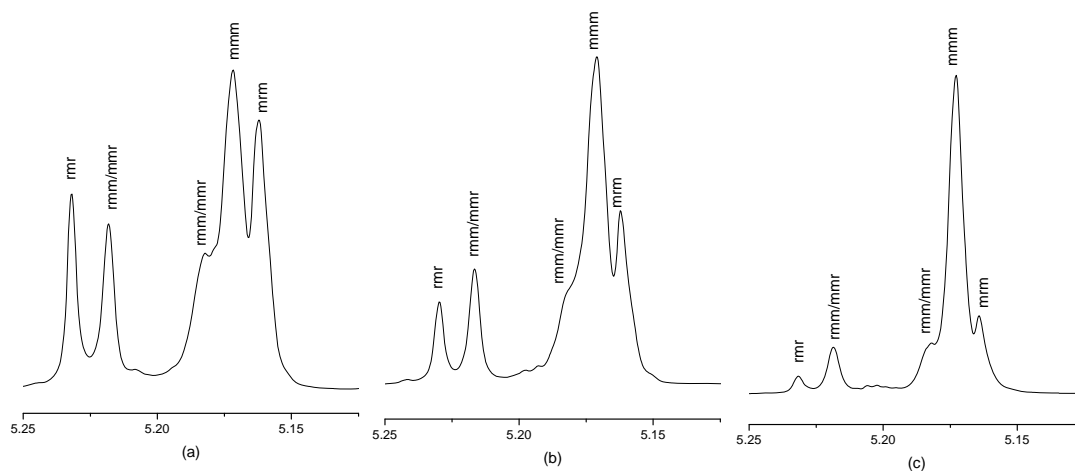

Figure S2. Homonuclear decoupled  $^1\text{H}$  NMR spectra ( $\text{CDCl}_3$ ,  $25^\circ\text{C}$ ) of the methine range of PLA obtained from *rac*-LA, (a) (Table 2, entry 1)  $P_m = 0.48$ ; (b) (Table 2, entry 3)  $P_m = 0.62$ ; (c) (Table 2, entry 14)  $P_m = 0.77$ .

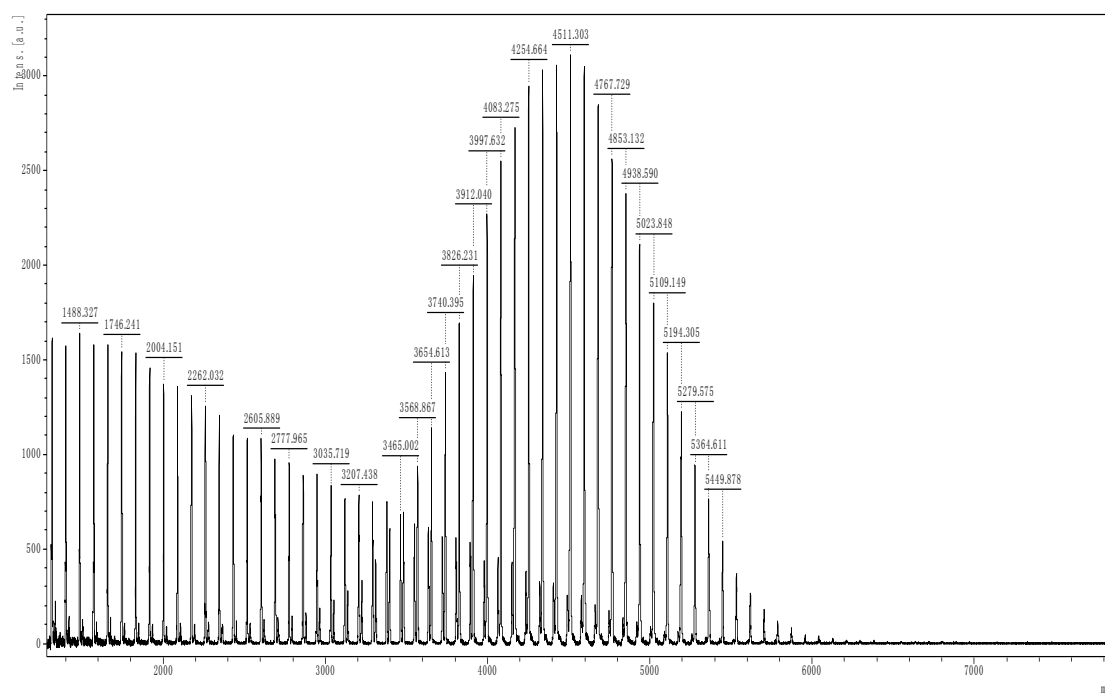

Figure S3. MALDI-TOF mass spectrum (matrix: DCTB) of the polymer isolated from *rac*- $\beta$ -BL polymerization (Table 3, entry 3).

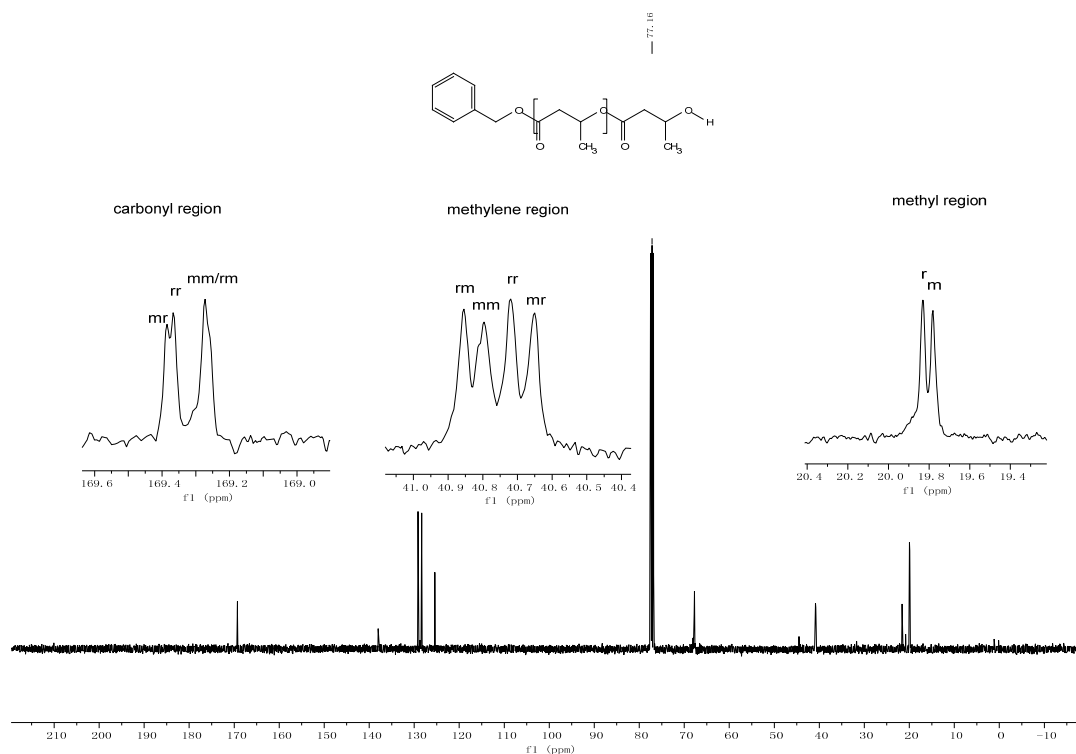

Figure S4.  $^{13}\text{C}$  NMR spectrum ( $\text{CDCl}_3$ , 101 MHz, 25 °C) of PHB.

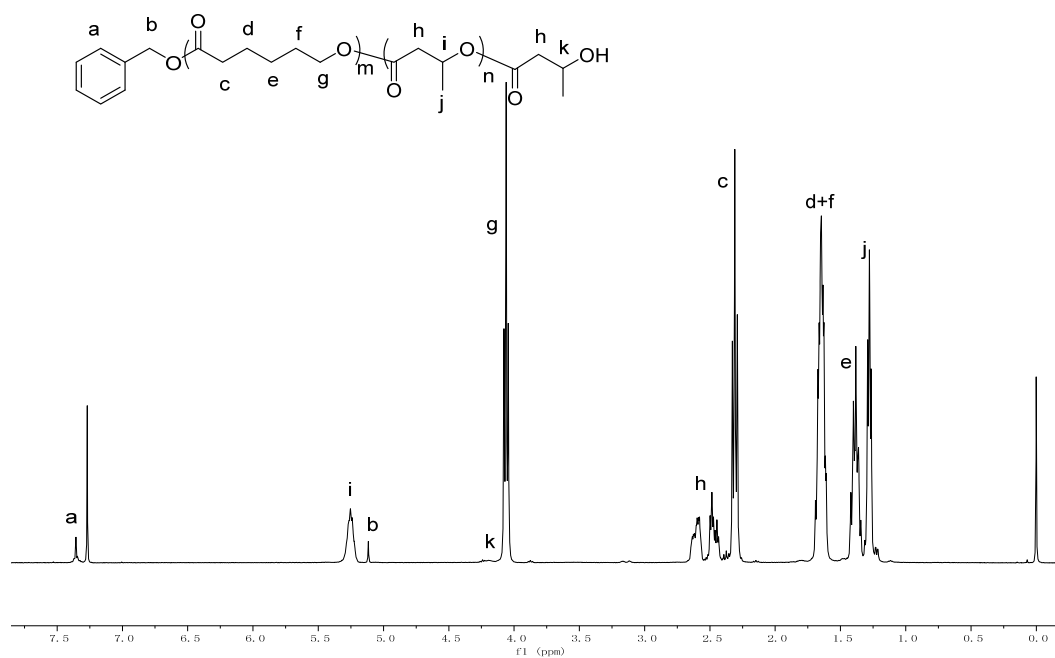

Figure S5.  $^1\text{H}$  NMR spectrum ( $\text{CDCl}_3$ , 400 MHz, 25 °C) of the PCL-b-PHB copolymer.

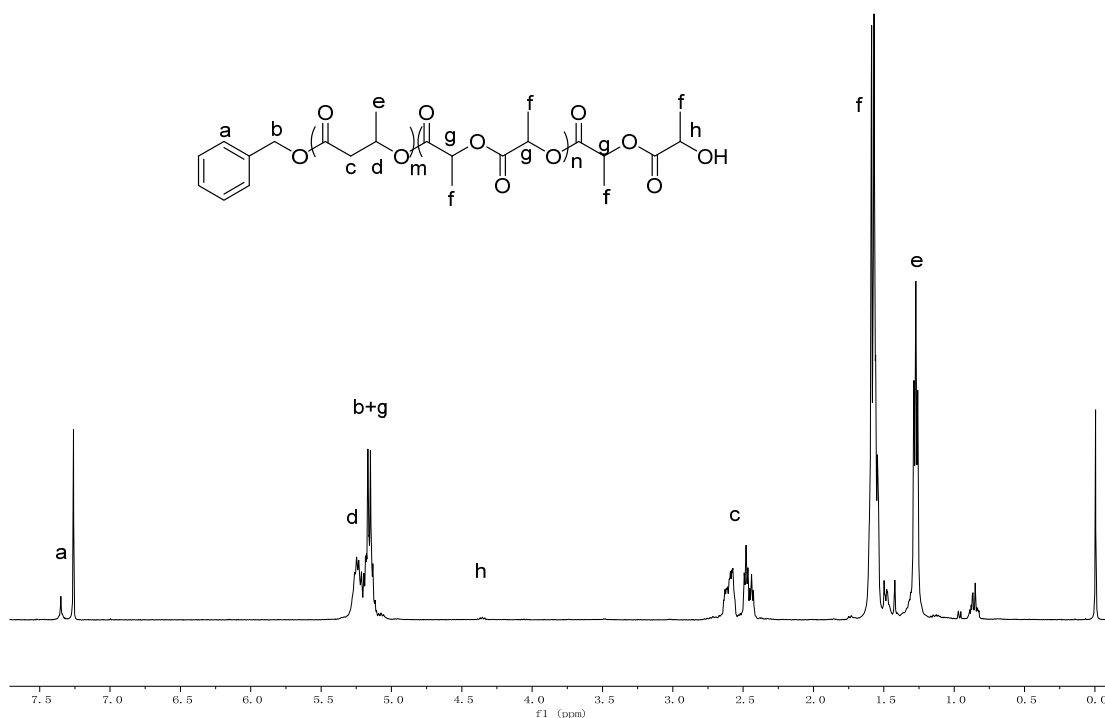

Figure S6. <sup>1</sup>H NMR spectrum (CDCl<sub>3</sub>, 400 MHz, 25 °C) of PHB-b-PLA

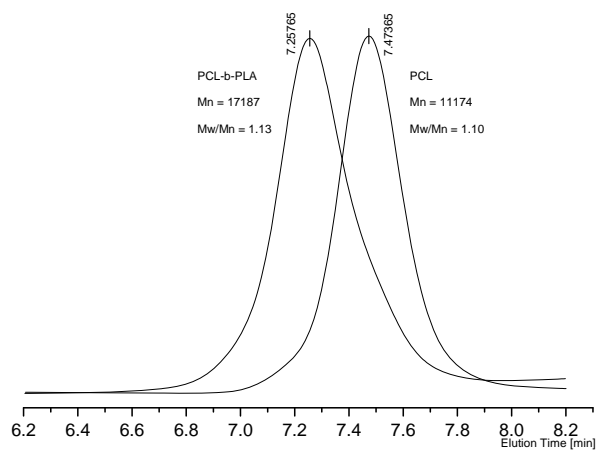

Figure S7. The GPC curves of PCL and PCL-b-PLA copolymer catalyzed by **2f**. Conditions: [Cat.]<sub>0</sub>: [ε-CL]<sub>0</sub>:[rac-LA]<sub>0</sub> = 1:100:100; [Cat.]<sub>0</sub> = 0.01 mol/L; solvent: toluene. When ε-CL monomer conversion approached to 99%, a 1/8 volume of sample was taken from the polymerization system for GPC test and *rac*-LA monomer was sequentially added into the reaction system to generate the block copolymer of PCL-b-PLA with 84.7% *rac*-LA conversion.

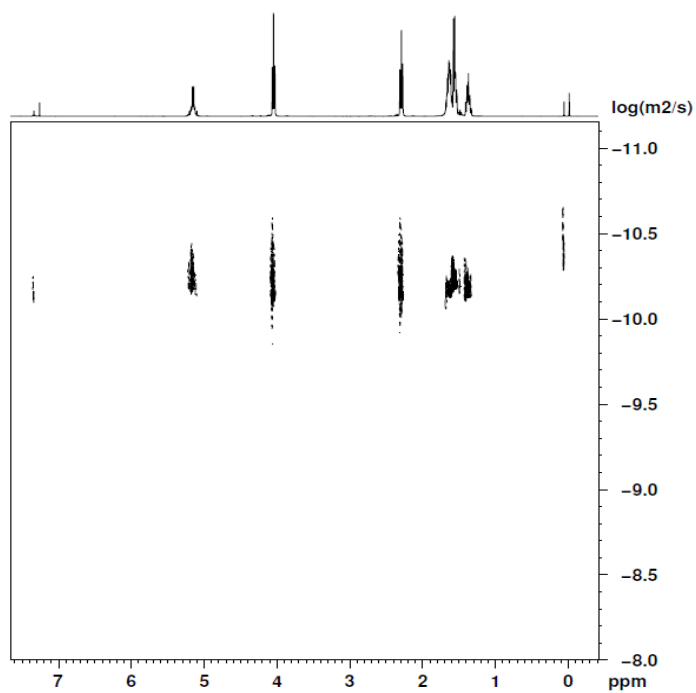

Figure S8. 2D DOSY NMR (CDCl<sub>3</sub>, 25 °C) of PCL-b- PLA.

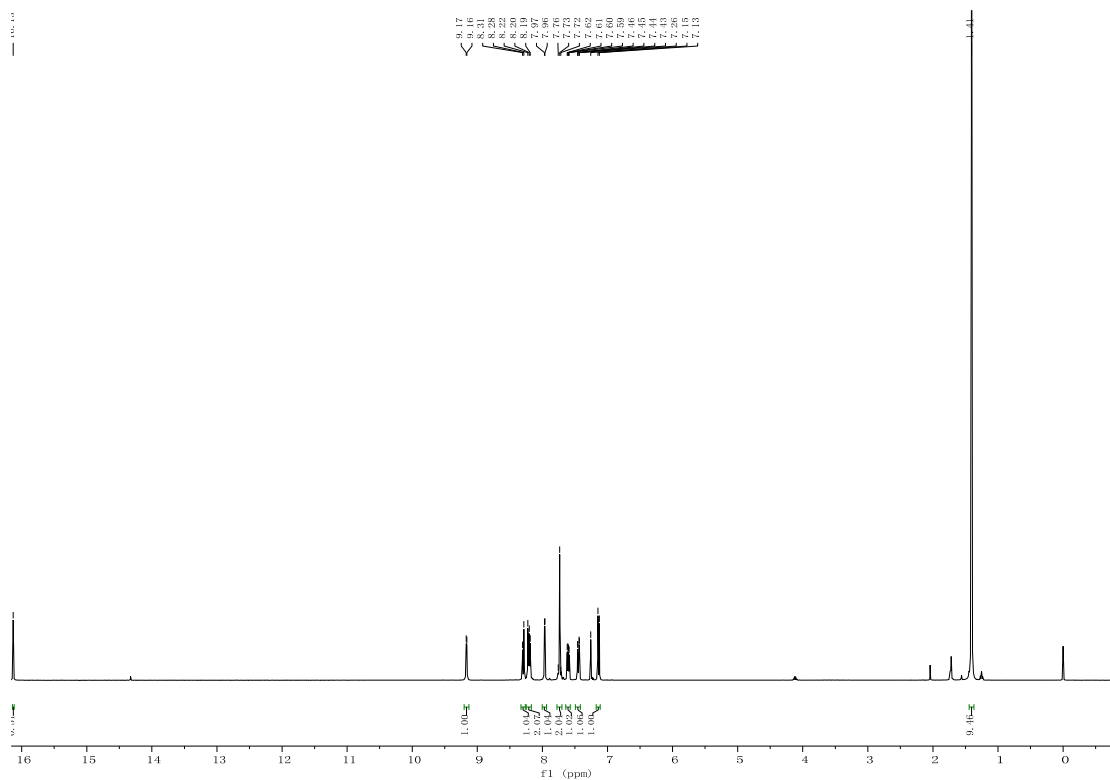

Figure S9. <sup>1</sup>H NMR spectrum (CDCl<sub>3</sub>, 400 MHz, 25 °C) of complex 1a.

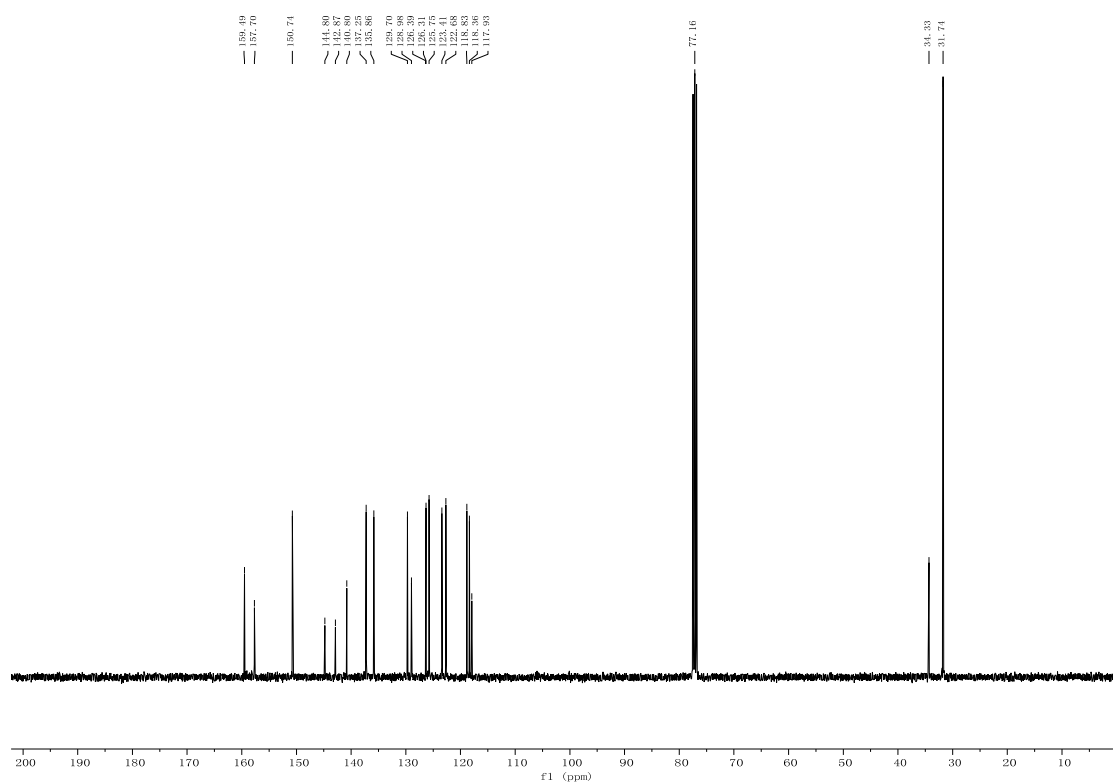

Figure S10.  $^{13}\text{C}$  NMR spectrum ( $\text{CDCl}_3$ , 101 MHz, 25  $^\circ\text{C}$ ) of complex **1a**.

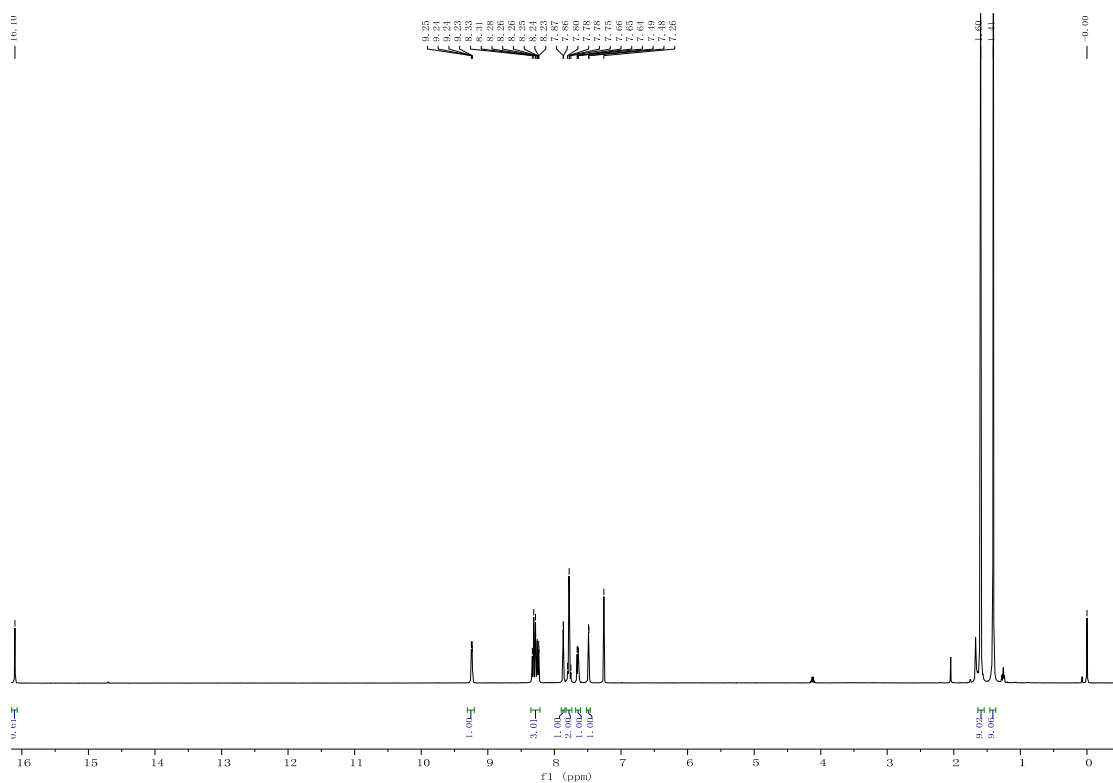

Figure S11.  $^1\text{H}$  NMR spectrum ( $\text{CDCl}_3$ , 400 MHz, 25  $^\circ\text{C}$ ) of complex **1b**.

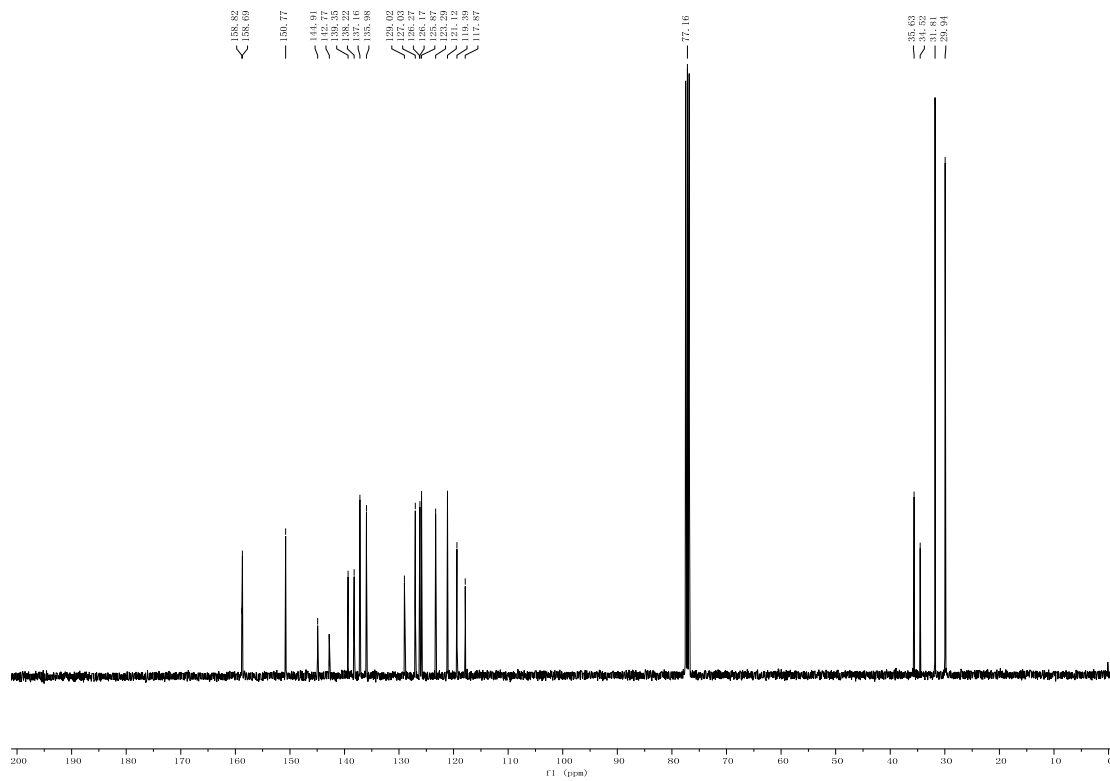

Figure S12.  $^{13}\text{C}$  NMR spectrum ( $\text{CDCl}_3$ , 101 MHz, 25  $^\circ\text{C}$ ) of complex **1b**.

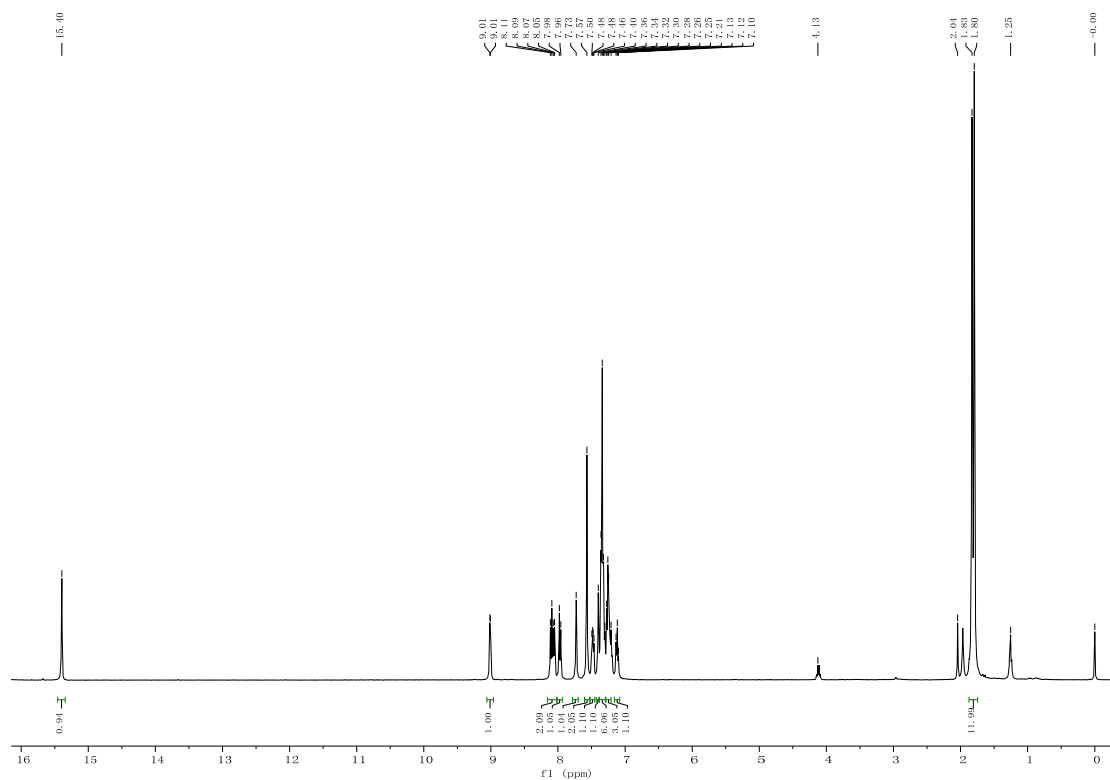

Figure S13.  $^1\text{H}$  NMR spectrum ( $\text{CDCl}_3$ , 400 MHz, 25  $^\circ\text{C}$ ) of complex **1c**.



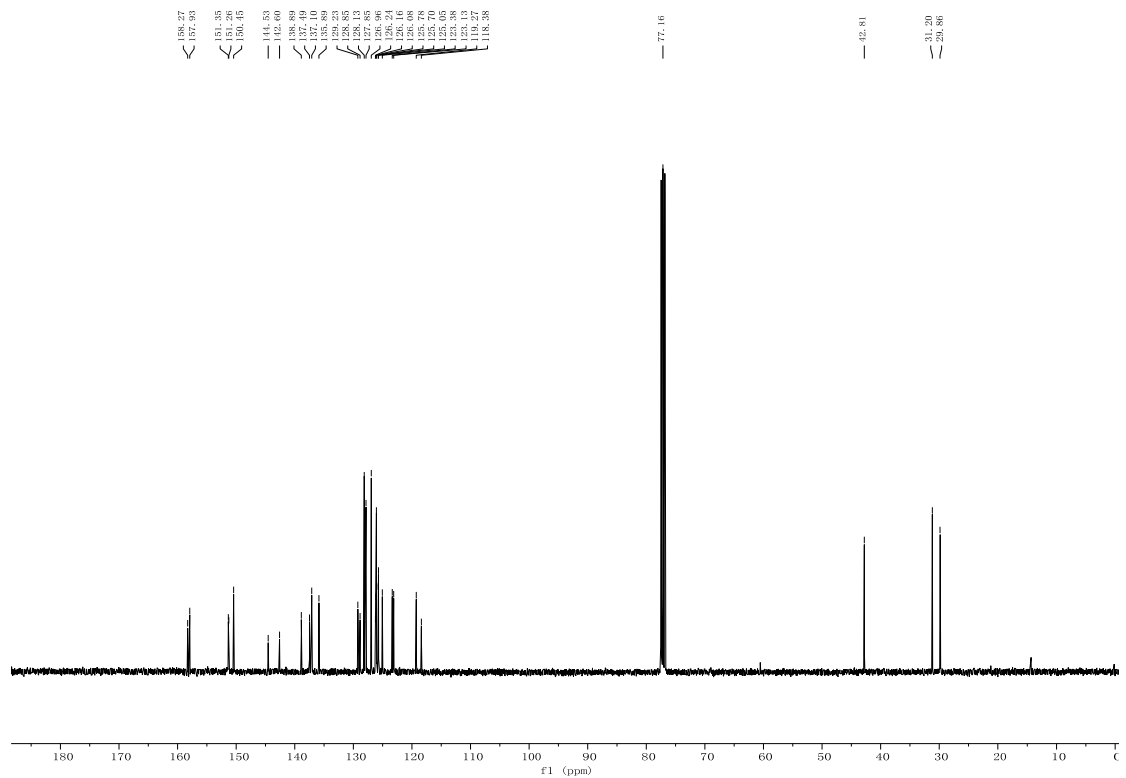

Figure S14.  $^{13}\text{C}$  NMR spectrum ( $\text{CDCl}_3$ , 101 MHz, 25  $^\circ\text{C}$ ) of complex **1c**.

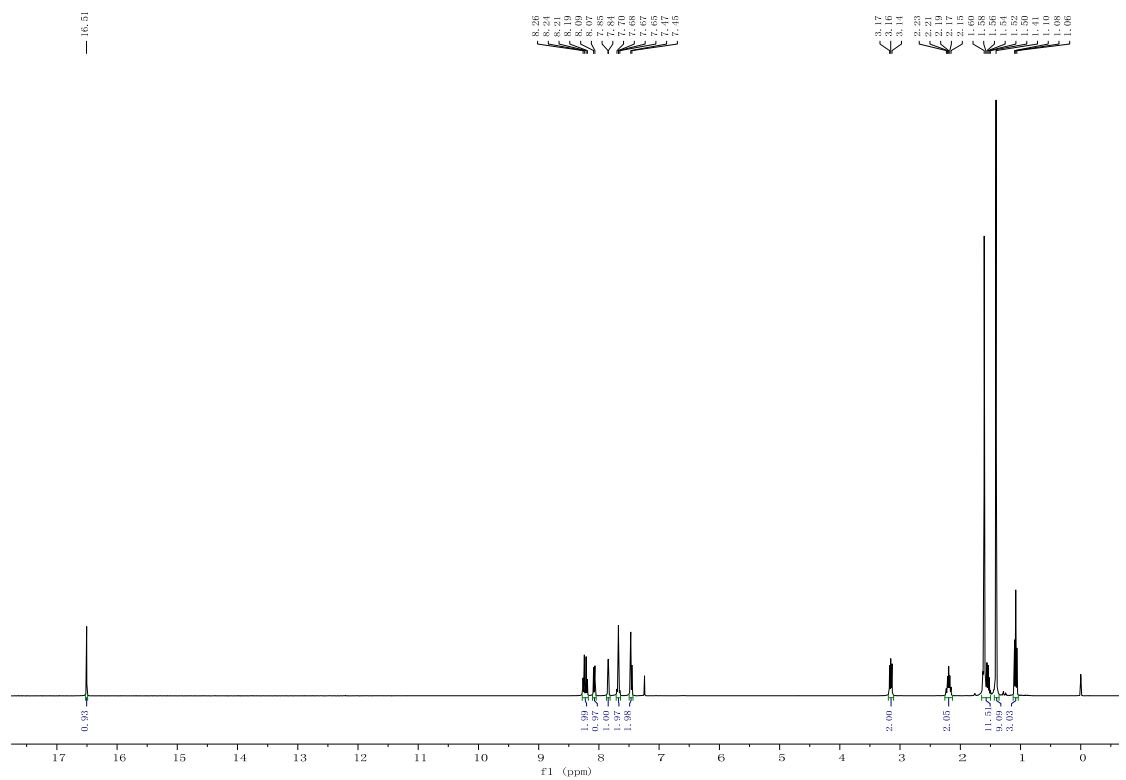

Figure S15.  $^1\text{H}$  NMR spectrum ( $\text{CDCl}_3$ , 400 MHz, 25  $^\circ\text{C}$ ) of complex **1d**.

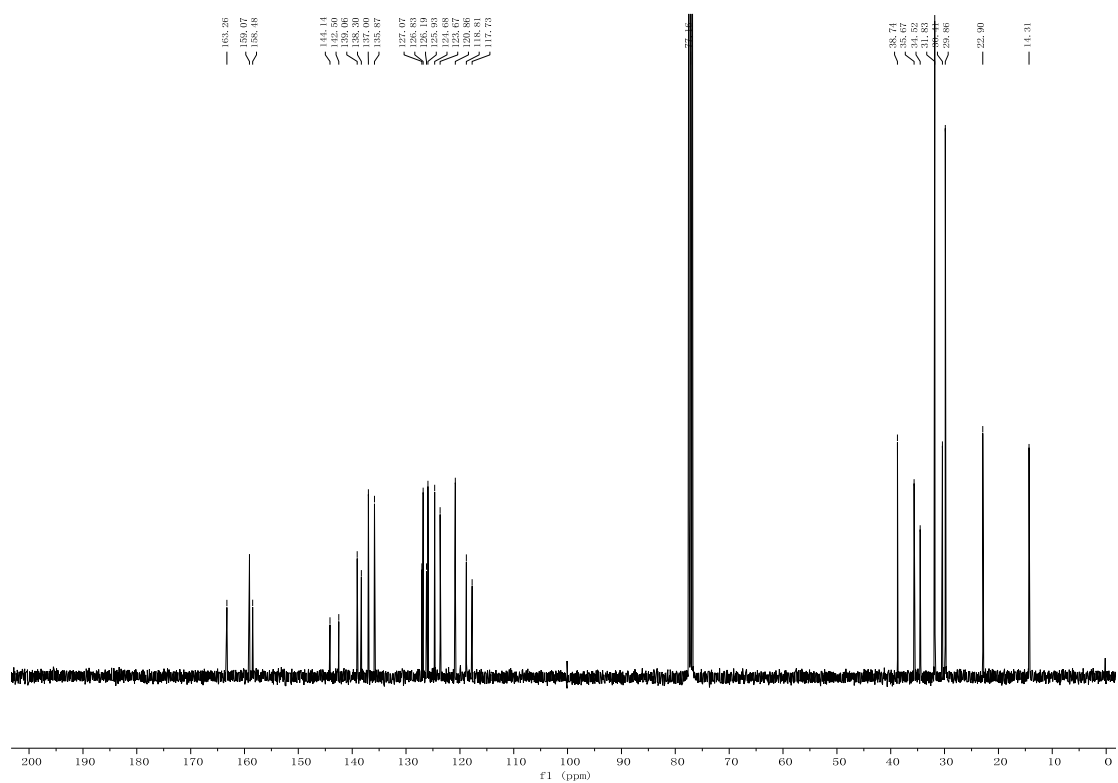

Figure S16.  $^{13}\text{C}$  NMR spectrum ( $\text{CDCl}_3$ , 101 MHz, 25 °C) of complex **1d**.

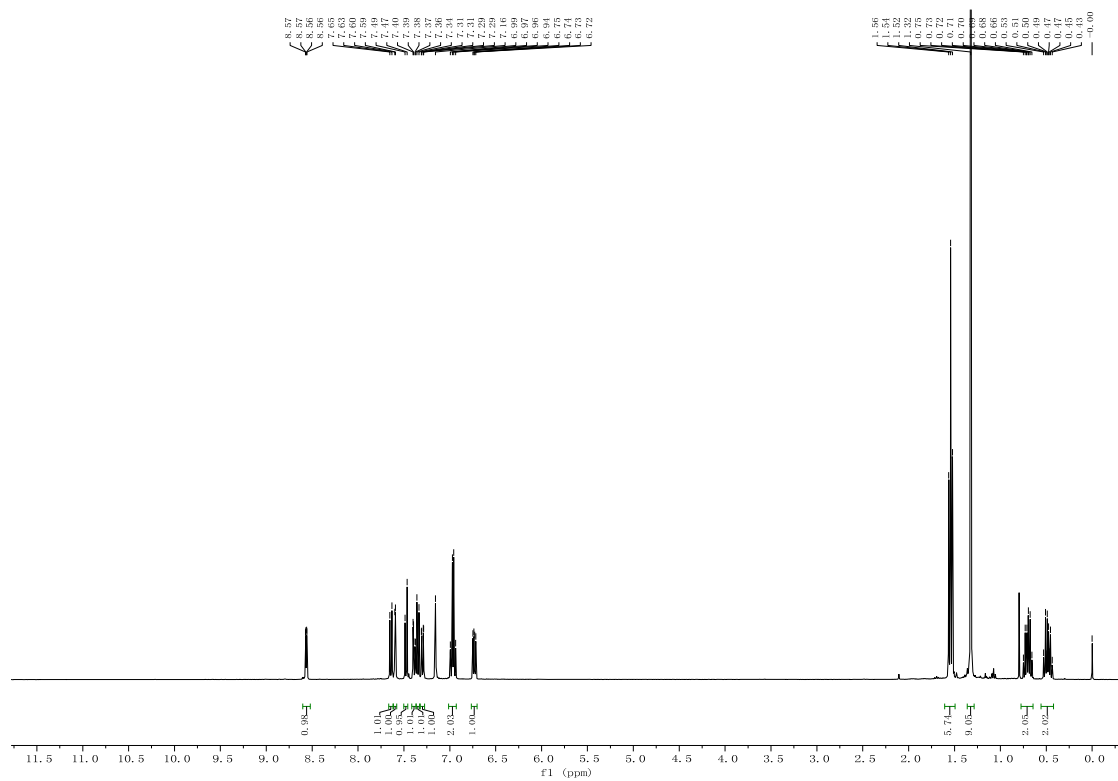

Figure S17.  $^1\text{H}$  NMR spectrum ( $\text{C}_6\text{D}_6$ , 400 MHz, 25 °C) of complex **2a**.

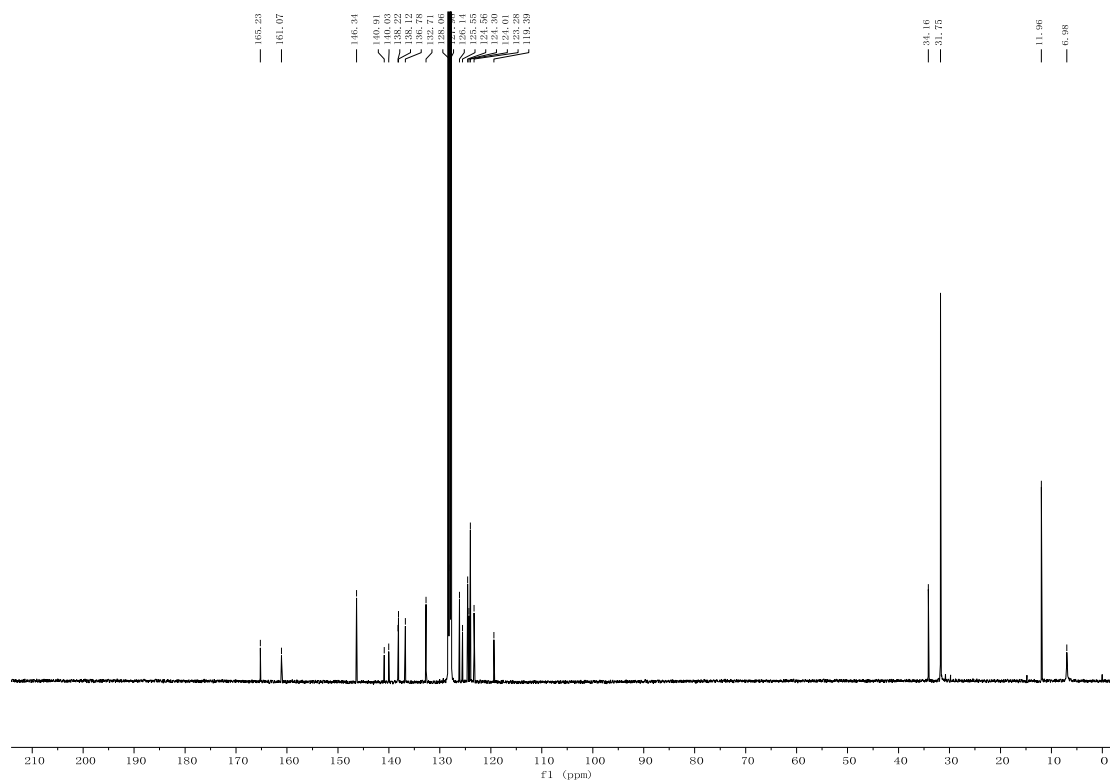

Figure S18.  $^{13}\text{C}$  NMR spectrum ( $\text{C}_6\text{D}_6$ , 101 MHz, 25 °C) of complex **2a**.

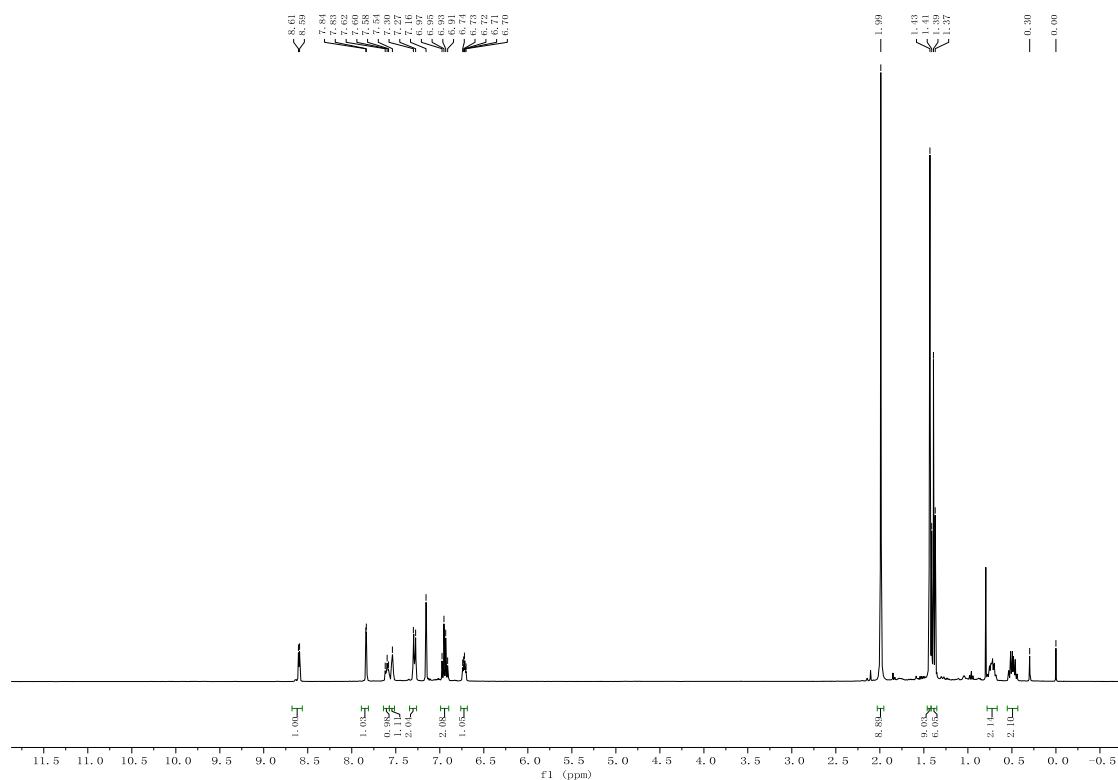

Figure S19.  $^1\text{H}$  NMR spectrum ( $\text{C}_6\text{D}_6$ , 400 MHz, 25 °C) of complex **2b**.

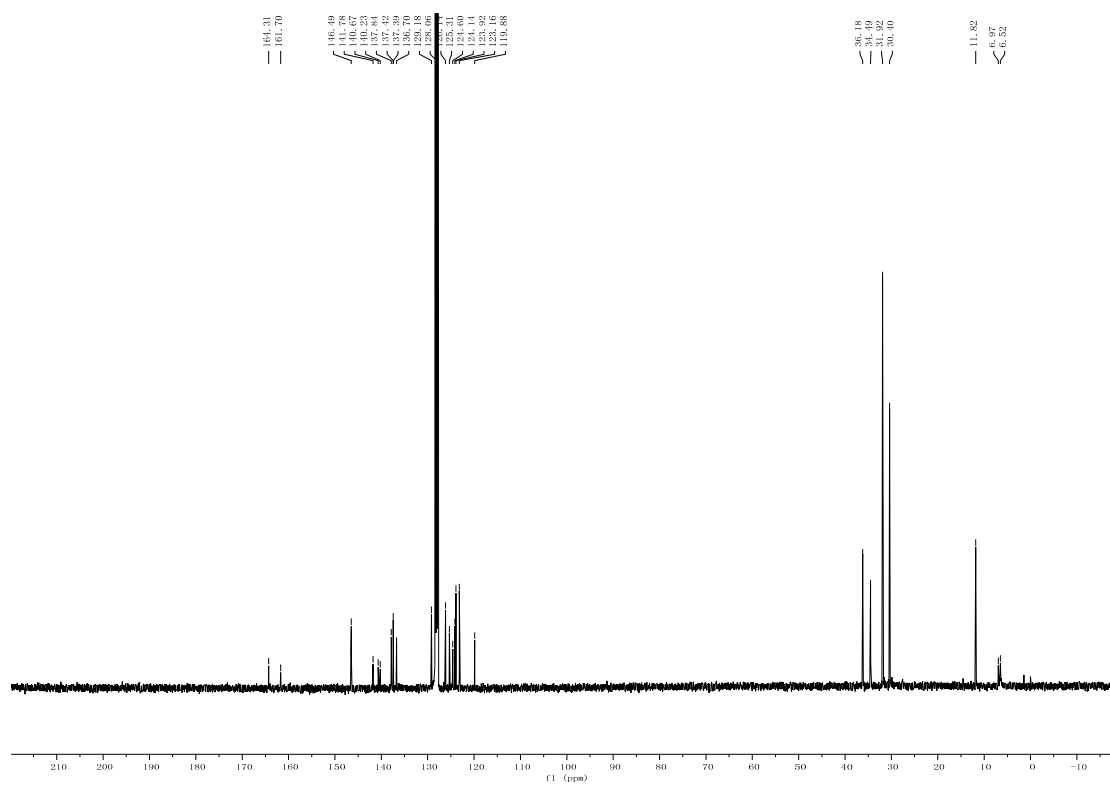

Figure S20.  $^{13}\text{C}$  NMR spectrum ( $\text{C}_6\text{D}_6$ , 101 MHz, 25 °C) of complex **2b**.

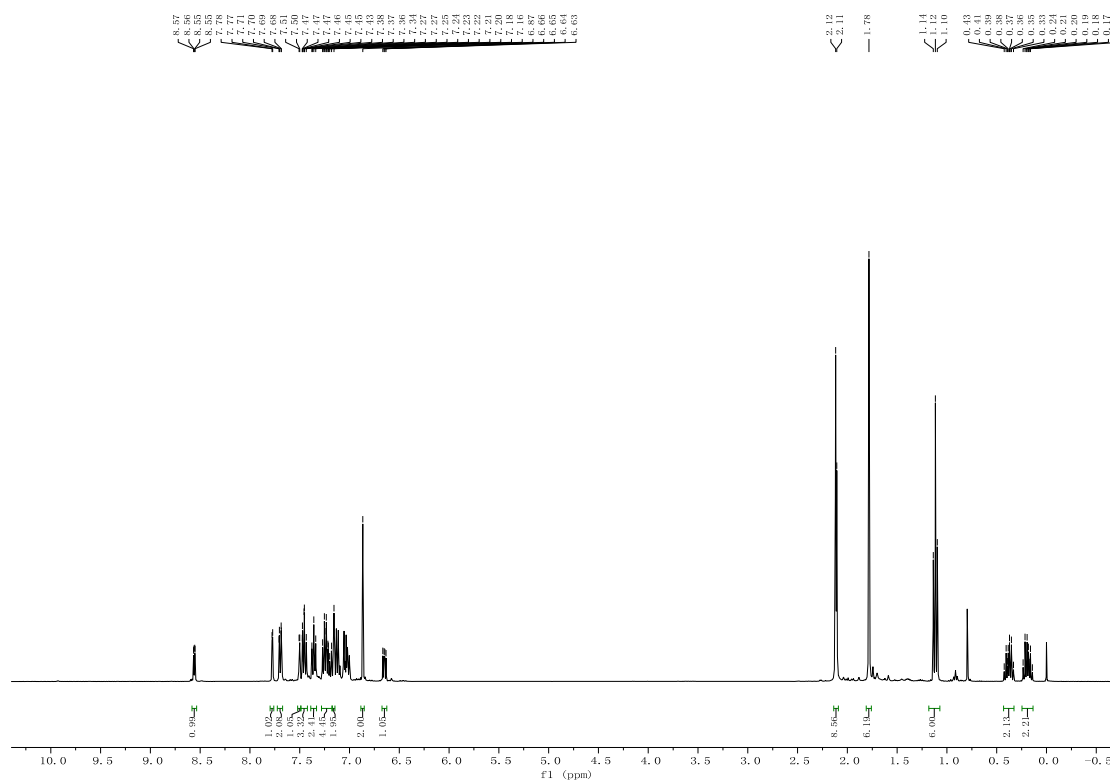

Figure S21.  $^1\text{H}$  NMR spectrum ( $\text{C}_6\text{D}_6$ , 400 MHz, 25 °C) of complex **2c**.

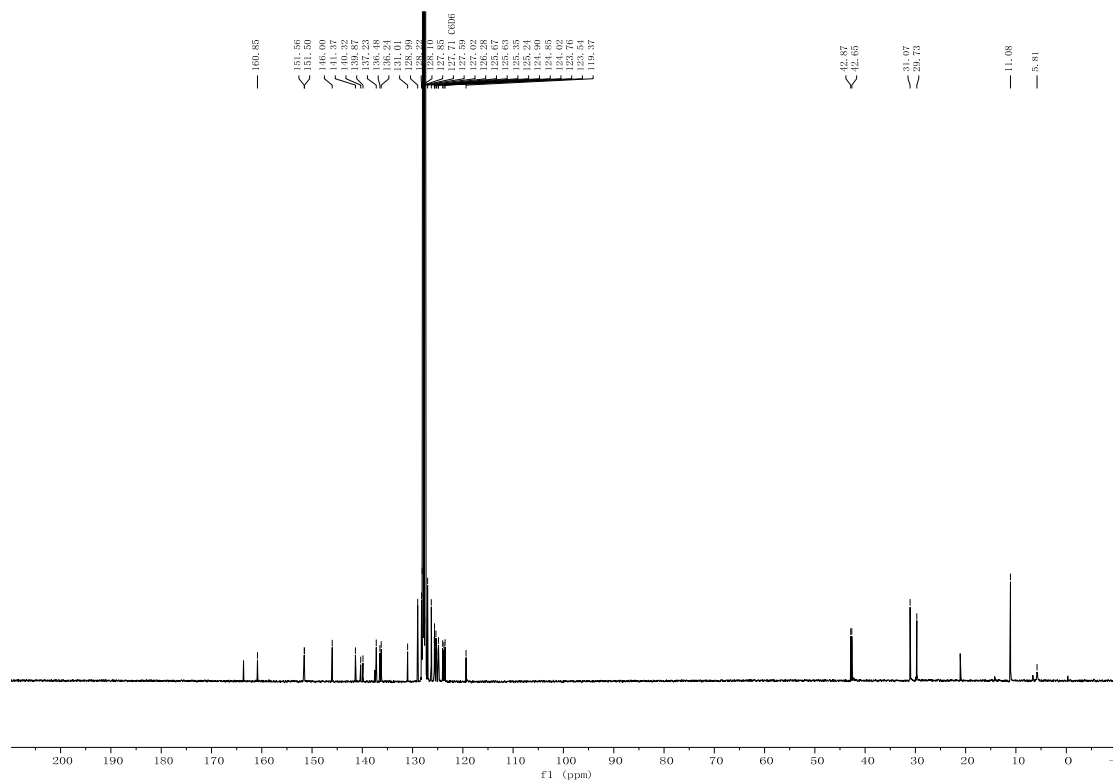

Figure S22.  $^{13}\text{C}$  NMR spectrum ( $\text{C}_6\text{D}_6$ , 101 MHz, 25 °C) of complex **2c**.

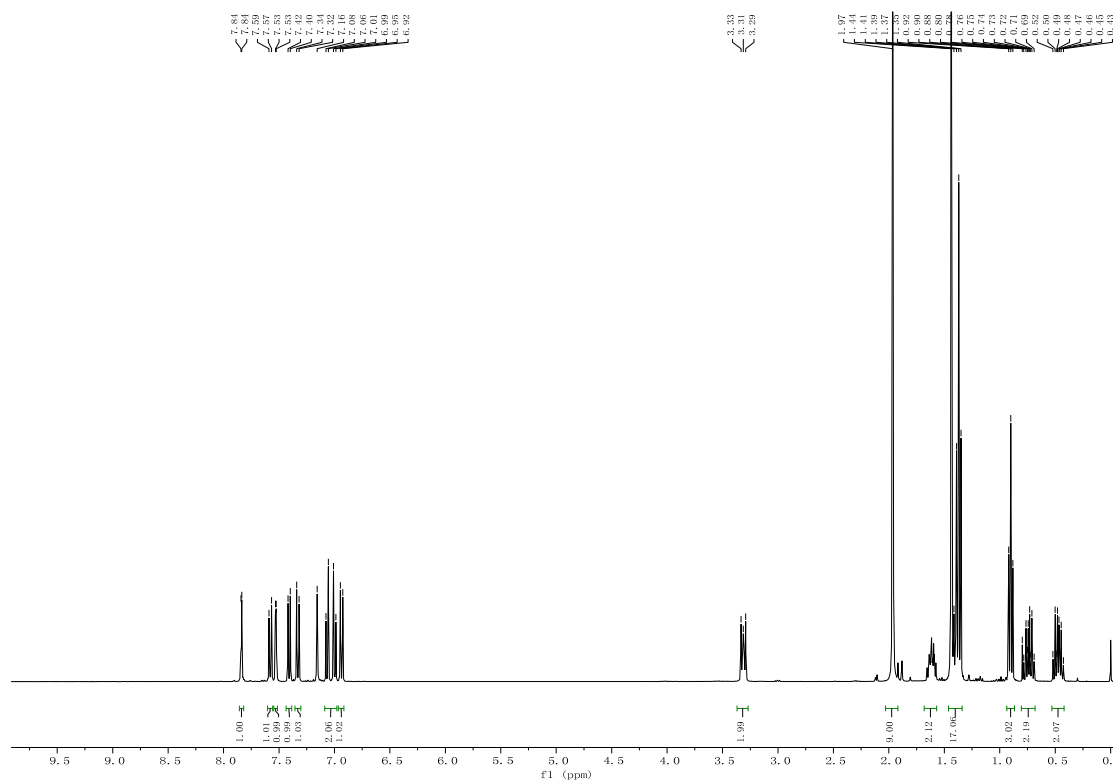

Figure S23.  $^1\text{H}$  NMR spectrum ( $\text{C}_6\text{D}_6$ , 400 MHz, 25 °C) of complex **2d**.

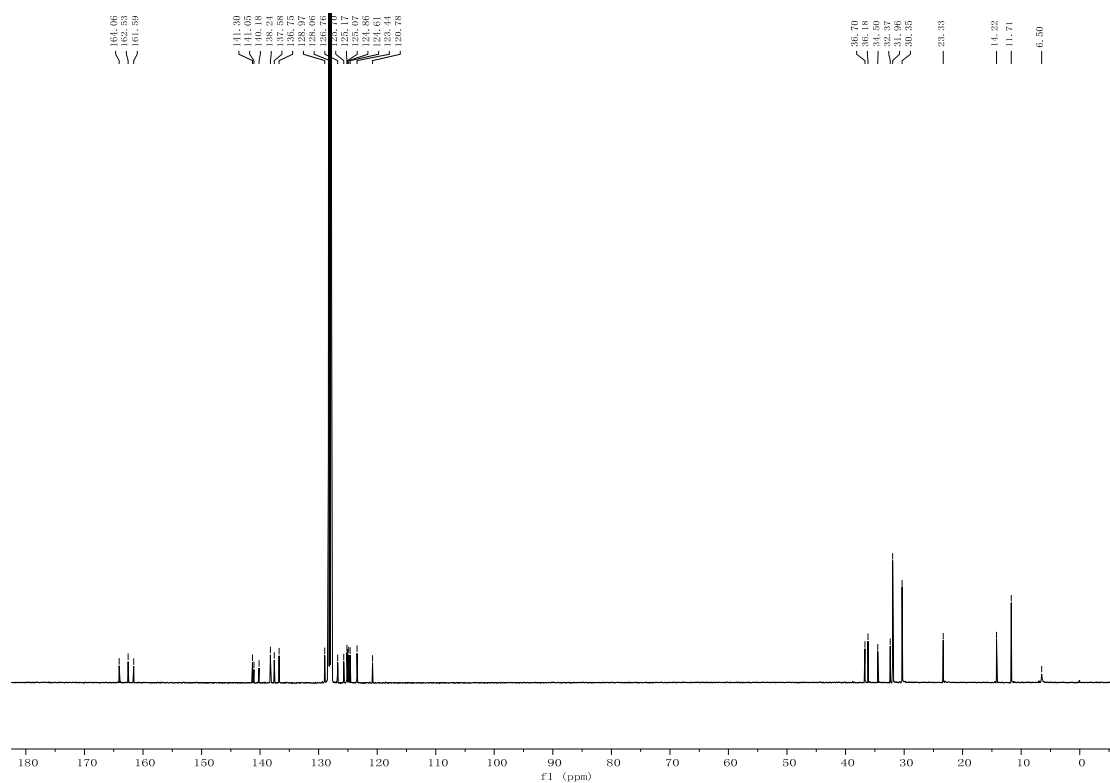

Figure S24.  $^{13}\text{C}$  NMR spectrum ( $\text{C}_6\text{D}_6$ , 101 MHz, 25 °C) of complex **2d**.

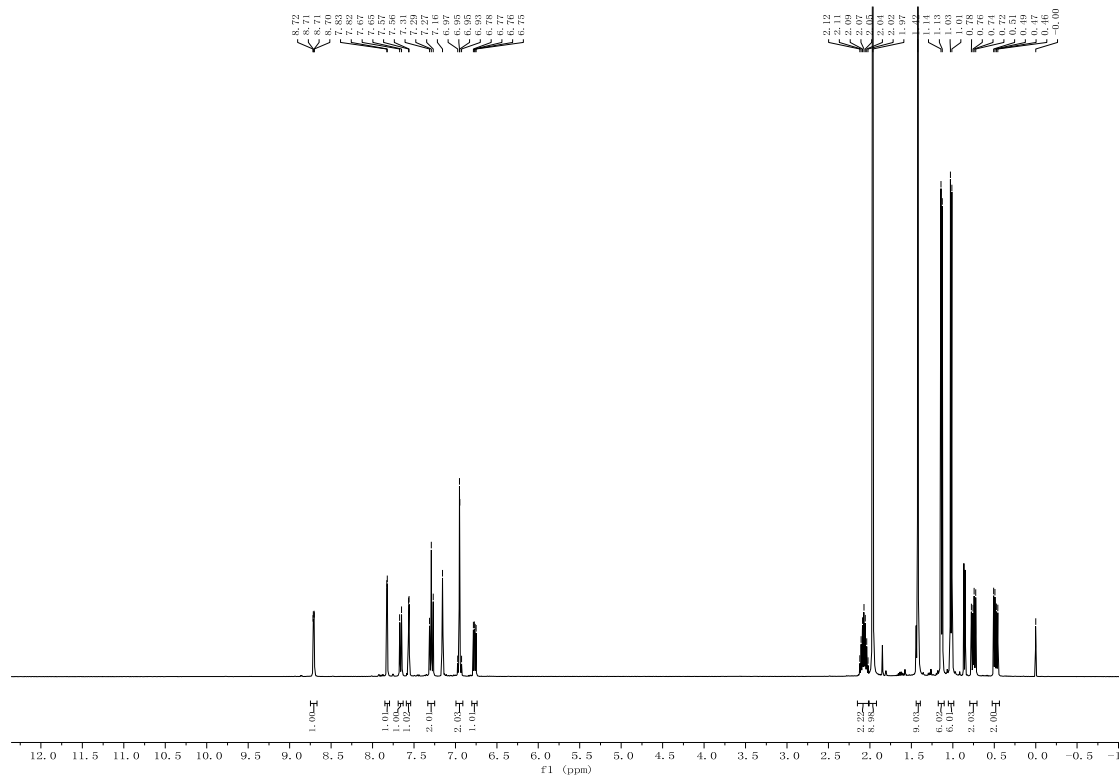

Figure S25.  $^1\text{H}$  NMR spectrum ( $\text{C}_6\text{D}_6$ , 400 MHz, 25 °C) of complex **2e**.

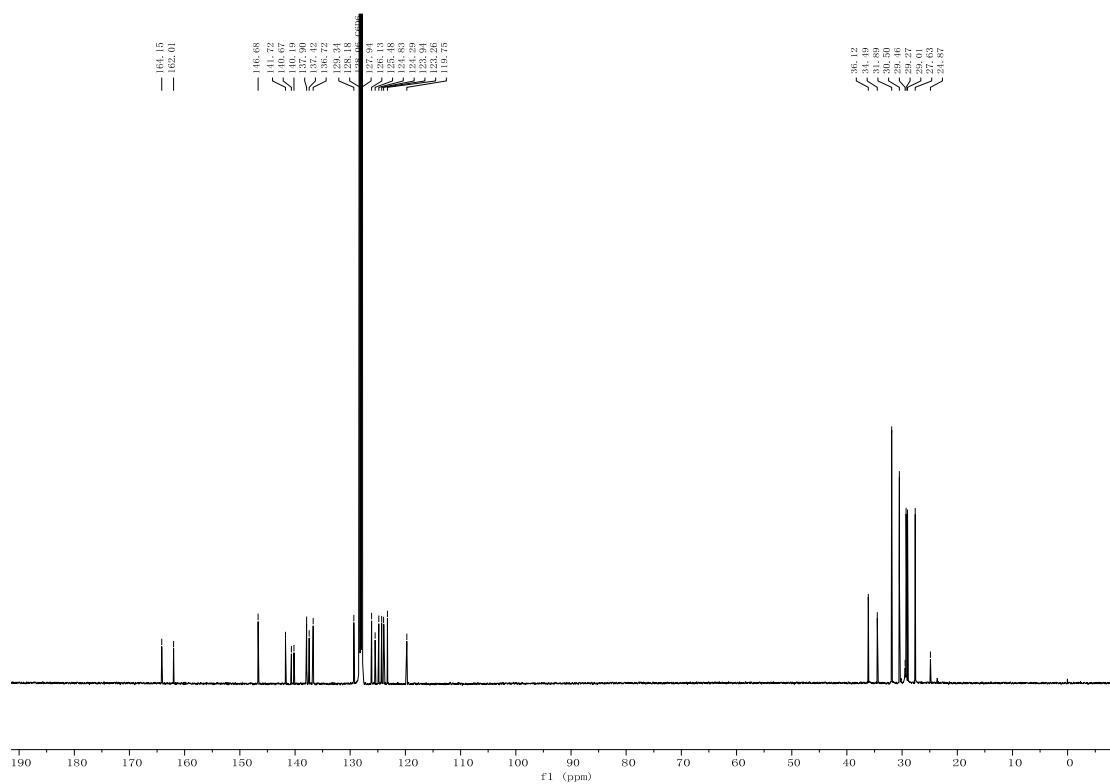

Figure S26.  $^{13}\text{C}$  NMR spectrum ( $\text{C}_6\text{D}_6$ , 101 MHz, 25 °C) of complex **2e**.

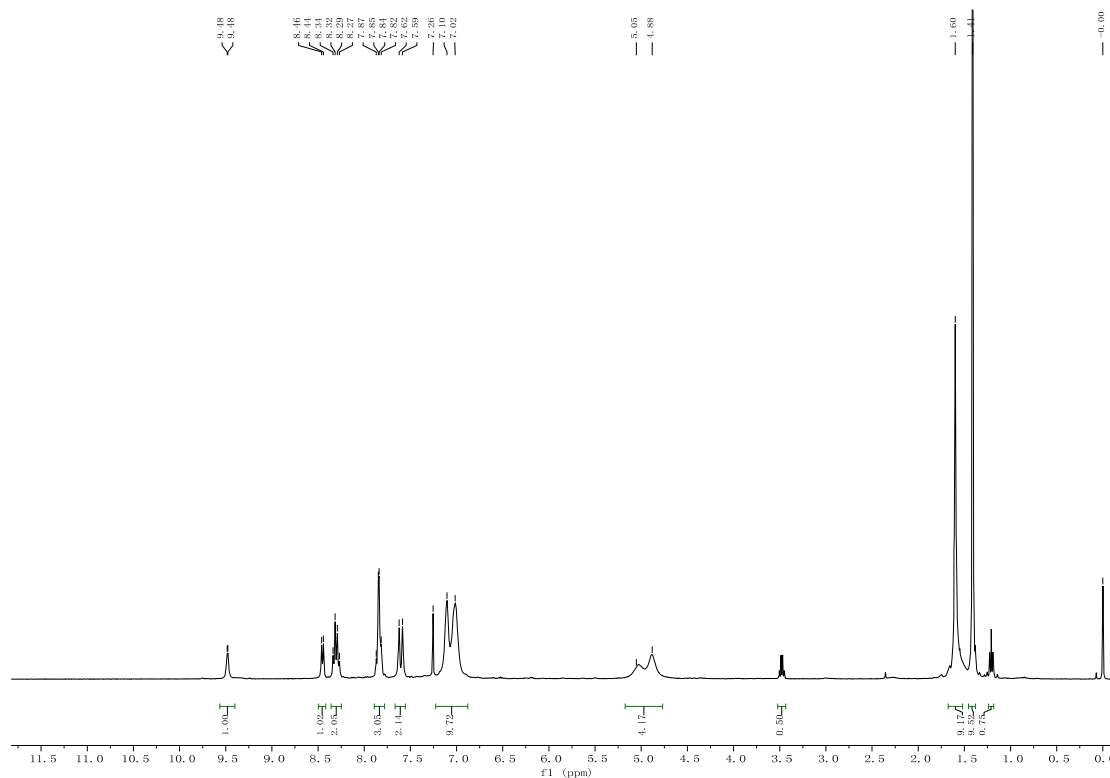

Figure S27.  $^1\text{H}$  NMR spectrum ( $\text{CDCl}_3$ , 400 MHz, 25 °C) of complex **2f**.

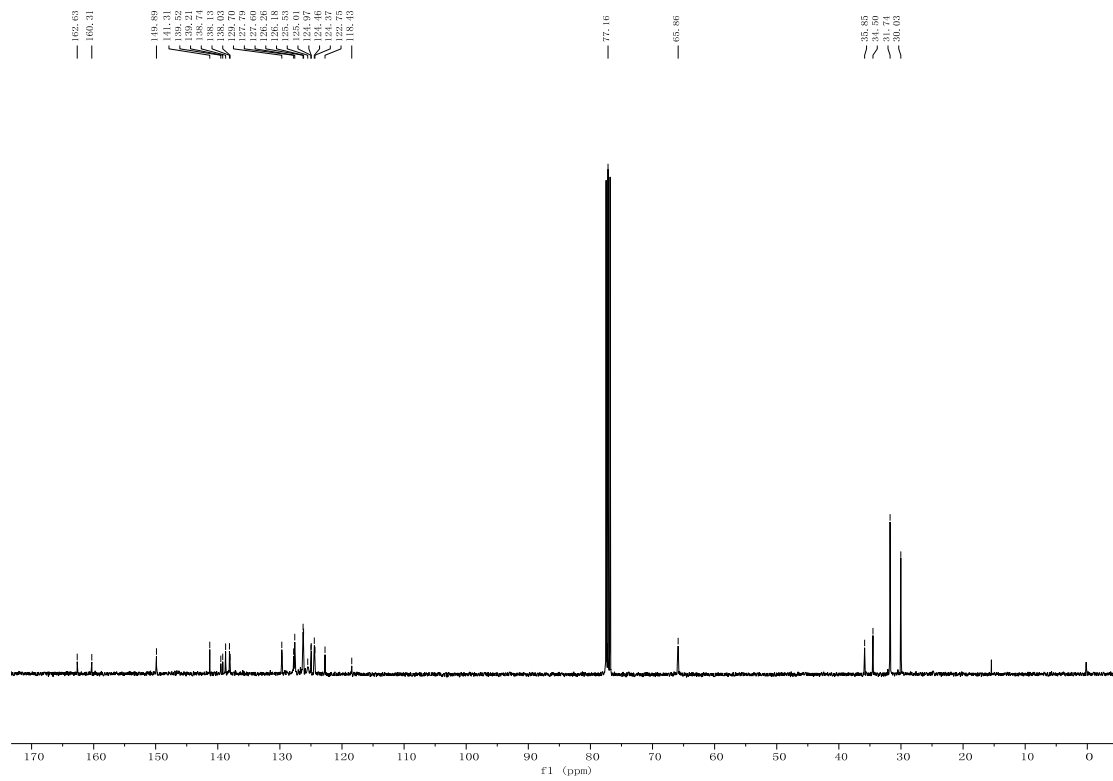

Figure S28.  $^{13}\text{C}$  NMR spectrum ( $\text{CDCl}_3$ , 101 MHz, 25 °C) of complex **2f**.
